# Supplementary material for: Emphysema-Predominant COPD Had a Greater 5-Year Mortality and a Worse Annual Decline in Lung Function Than Airway Obstruction-Predominant COPD or Asthma at Initial Same Degree of Airflow Obstruction
Source: MDPI journal article supplement (doi:10.3390/medicina57111261), 2021-11-17
Supplement: s1 [file s1]

## Online supplementary tables

**Table S1.** All regression coefficients for the mixed-model repeated-measure model for FEV<sub>1</sub> (forced expiratory volume in one second, mL).

| Solution for Fixed Effects |        |          |                |     |         |         |
|----------------------------|--------|----------|----------------|-----|---------|---------|
| Effect                     | group  | Estimate | Standard Error | DF  | t Value | p-value |
| Intercept                  |        | 1246.420 | 44.995         | 152 | 27.70   | <.0001  |
| time                       |        | -4.202   | 1.114          | 143 | -3.77   | 0.0002  |
| group                      | Asthma | -19.670  | 71.874         | 938 | -0.27   | 0.7844  |
| group                      | COPD   | 0        | .              | .   | .       | .       |
| time*group                 | Asthma | 2.597    | 1.041          | 938 | 2.50    | 0.0127  |
| time*group                 | COPD   | 0        | .              | .   | .       | .       |
| time*time                  |        | 0.013    | 0.020          | 938 | 0.69    | 0.4916  |

| Type 3 Tests of Fixed Effects |        |        |         |         |
|-------------------------------|--------|--------|---------|---------|
| Effect                        | Num DF | Den DF | F Value | p-value |
| time                          | 1      | 143    | 7.74    | 0.0061  |
| group                         | 1      | 938    | 0.07    | 0.7844  |
| time*group                    | 1      | 938    | 6.23    | 0.0127  |
| time*time                     | 1      | 938    | 0.47    | 0.4916  |

**Table S2.** All regression coefficients for the mixed-model repeated-measure model for FEV<sub>1</sub> predicted value (%).

| Solution for Fixed Effects |        |          |                |     |         |         |
|----------------------------|--------|----------|----------------|-----|---------|---------|
| Effect                     | group  | Estimate | Standard Error | DF  | t Value | p-value |
| Intercept                  |        | 56.469   | 2.074          | 152 | 27.22   | <.0001  |
| time                       |        | -0.209   | 0.060          | 143 | -3.49   | 0.0007  |
| group                      | Asthma | 0.261    | 3.301          | 938 | 0.08    | 0.9371  |
| group                      | COPD   | 0        | .              | .   | .       | .       |
| time*group                 | Asthma | 0.121    | 0.058          | 938 | 2.07    | 0.0389  |
| time*group                 | COPD   | 0        | .              | .   | .       | .       |
| time*time                  |        | 0.001    | 0.001          | 938 | 0.74    | 0.4614  |

| Type 3 Tests of Fixed Effects |        |        |         |         |
|-------------------------------|--------|--------|---------|---------|
| Effect                        | Num DF | Den DF | F Value | p-value |
| time                          | 1      | 143    | 7.06    | 0.0088  |
| group                         | 1      | 938    | 0.01    | 0.9371  |
| time*group                    | 1      | 938    | 4.28    | 0.0389  |
| time*time                     | 1      | 938    | 0.54    | 0.4614  |

**Table S3.** All regression coefficients for the mixed-model repeated-measure model for FVC (forced vital capacity, mL).

| Solution for Fixed Effects |        |          |                |     |                |                 |
|----------------------------|--------|----------|----------------|-----|----------------|-----------------|
| Effect                     | group  | Estimate | Standard Error | DF  | <i>t</i> value | <i>p</i> -value |
| Intercept                  |        | 2128.370 | 55.582         | 152 | 38.29          | <.0001          |
| time                       |        | -5.858   | 1.793          | 143 | -3.27          | 0.0014          |
| group                      | Asthma | -186.540 | 87.958         | 938 | -2.12          | 0.0342          |
| group                      | COPD   | 0        | .              | .   | .              | .               |
| time*group                 | Asthma | 2.238    | 1.585          | 938 | 1.41           | 0.1582          |
| time*group                 | COPD   | 0        | .              | .   | .              | .               |
| time*time                  |        | 0.059    | 0.032          | 938 | 1.83           | 0.0677          |

| Type 3 Tests of Fixed Effects |        |        |         |                 |
|-------------------------------|--------|--------|---------|-----------------|
| Effect                        | Num DF | Den DF | F Value | <i>p</i> -value |
| time                          | 1      | 143    | 7.89    | 0.0057          |
| group                         | 1      | 938    | 4.50    |                 |
| time*group                    | 1      | 938    | 1.99    | 0.1582          |
| time*time                     | 1      | 938    | 3.35    | 0.0677          |

**Table S4.** All regression coefficients for the mixed-model repeated-measure model for FVC predicted value (%).

| Solution for Fixed Effects |        |          |                |     |                |                 |
|----------------------------|--------|----------|----------------|-----|----------------|-----------------|
| Effect                     | group  | Estimate | Standard Error | DF  | <i>t</i> value | <i>p</i> -value |
| Intercept                  |        | 69.400   | 1.678          | 151 | 41.36          | <.0001          |
| time                       |        | -0.122   | 0.074          | 142 | -1.65          | 0.1002          |
| group                      | Asthma | -2.430   | 2.622          | 936 | -0.93          | 0.3543          |
| group                      | COPD   | 0        | .              | .   | .              | .               |
| time*group                 | Asthma | 0.101    | 0.068          | 936 | 1.49           | 0.1354          |
| time*group                 | COPD   | 0        | .              | .   | .              | .               |
| time*time                  |        | 0.001059 | 0.001301       | 936 | 0.81           | 0.4162          |

| Type 3 Tests of Fixed Effects |        |        |         |                 |
|-------------------------------|--------|--------|---------|-----------------|
| Effect                        | Num DF | Den DF | F Value | <i>p</i> -value |
| time                          | 1      | 142    | 1.06    | 0.3053          |
| group                         | 1      | 936    | 0.86    | 0.3543          |
| time*group                    | 1      | 936    | 2.23    | 0.1354          |
| time*time                     | 1      | 936    | 0.66    | 0.4162          |

**Table S5** All regression coefficients for the mixed-model repeated-measure model for FEV<sub>1</sub> (forced expiratory volume in one second, mL) in three groups.

| <b>Solution for Fixed Effects</b> |                           |          |                |     |         |         |
|-----------------------------------|---------------------------|----------|----------------|-----|---------|---------|
| Effect                            | group                     | Estimate | Standard Error | DF  | t Value | p-Value |
| Intercept                         |                           | 1226.550 | 56.576         | 150 | 21.68   | <.0001  |
| time                              |                           | -1.568   | 1.214          | 140 | -1.29   | 0.1986  |
| group                             | COPD HRCT score $\leq 10$ | -10.780  | 85.039         | 936 | -0.13   | 0.8992  |
| group                             | COPD HRCT score $>10$     | 41.215   | 85.030         | 936 | 0.48    | 0.6280  |
| group                             | Asthma                    | 0        | .              | .   | .       | .       |
| time*group                        | COPD HRCT score $\leq 10$ | -1.702   | 1.214          | 936 | -1.40   | 0.1615  |
| time*group                        | COPD HRCT score $>10$     | -3.635   | 1.217          | 936 | -2.99   | 0.0029  |
| time*group                        | Asthma                    | 0        | .              | .   | .       | .       |
| time*time                         |                           | 0.013    | 0.020          | 936 | 0.64    | 0.5218  |

| <b>Type 3 Tests of Fixed Effects</b> |        |        |         |         |
|--------------------------------------|--------|--------|---------|---------|
| Effect                               | Num DF | Den DF | F Value | p-Value |
| time                                 | 1      | 140    | 10.32   | 0.0016  |
| group                                | 2      | 936    | 0.19    | 0.8279  |
| time*group                           | 2      | 936    | 4.47    | 0.0117  |
| time*time                            | 1      | 936    | 0.41    | 0.5218  |

**Table S6** All regression coefficients for the mixed-model repeated-measure model for FEV<sub>1</sub> predicted value (%) in the three groups.

| <b>Solution for Fixed Effects</b> |                         |          |                |     |         |         |
|-----------------------------------|-------------------------|----------|----------------|-----|---------|---------|
| Effect                            | group                   | Estimate | Standard Error | DF  | t Value | p-Value |
| Intercept                         |                         | 56.718   | 2.603          | 151 | 21.79   | <.0001  |
| time                              |                         | -0.086   | 0.066          | 141 | -1.30   | 0.1951  |
| group                             | COPD HRCT score<br>≤ 10 | -0.074   | 4.352          | 939 | -0.02   | 0.9865  |
| group                             | COPD HRCT<br>score >10  | -0.332   | 3.640          | 939 | -0.09   | 0.9273  |
| group                             | Asthma                  | 0        | .              | .   | .       | .       |
| time*group                        | COPD HRCT score<br>≤ 10 | -0.087   | 0.074          | 939 | -1.18   | 0.2396  |
| time*group                        | COPD HRCT<br>score >10  | -0.142   | 0.065          | 939 | -2.18   | 0.0296  |
| time*group                        | Asthma                  | 0        | .              | .   | .       | .       |
| time*time                         |                         | 0.001    | 0.001          | 939 | 0.69    | 0.4905  |

| <b>Type 3 Tests of Fixed Effects</b> |        |        |         |         |
|--------------------------------------|--------|--------|---------|---------|
| Effect                               | Num DF | Den DF | F Value | P-Value |
| time                                 | 1      | 141    | 8.32    | 0.0045  |
| group                                | 2      | 939    | 0.00    | 0.9956  |
| time*group                           | 2      | 939    | 2.41    | 0.0908  |
| time*time                            | 1      | 939    | 0.48    | 0.4905  |

**Table S7** All regression coefficients for the mixed-model repeated-measure model for FVC (forced vital capacity, mL) in three groups.

| Solution for Fixed Effects |                           |          |                |     |         |         |
|----------------------------|---------------------------|----------|----------------|-----|---------|---------|
| Effect                     | group                     | Estimate | Standard Error | DF  | t Value | P-Value |
|                            |                           | 1940.730 | 68.543         | 150 | 28.31   | <.0001  |
| time                       | Intercept                 | -3.441   | 1.929          | 140 | -1.78   | 0.0767  |
| group                      | COPD HRCT score $\leq 10$ | 55.798   | 103.090        | 936 | 0.54    | 0.5884  |
| group                      | COPD HRCT score >10       | 313.680  | 103.090        | 936 | 3.04    | 0.0024  |
| group                      | Asthma                    | 0        | .              | .   | .       | .       |
| time*group                 | COPD HRCT score $\leq 10$ | -0.894   | 1.850          | 936 | -0.48   | 0.6290  |
| time*group                 | COPD HRCT score >10       | -3.872   | 1.859          | 936 | -2.08   | 0.0376  |
| time*group                 | Asthma                    | 0        | .              | .   | .       | .       |
| time*time                  |                           | 0.055    | 0.032          | 936 | 1.71    | 0.0882  |

| Type 3 Tests of Fixed Effects |        |        |         |         |
|-------------------------------|--------|--------|---------|---------|
| Effect                        | Num DF | Den DF | F Value | P-Value |
| time                          | 1      | 140    | 8.89    | 0.0034  |
| group                         | 2      | 936    | 5.01    | 0.0069  |
| time*group                    | 2      | 936    | 2.27    | 0.1039  |
| time*time                     | 1      | 936    | 2.91    | 0.0882  |

**Table S8.** All regression coefficients for the mixed-model repeated-measure model for FVC predicted value (%) in the three groups.

| Solution for Fixed Effects |                           |          |                |     |         |         |
|----------------------------|---------------------------|----------|----------------|-----|---------|---------|
| Effect                     | group                     | Estimate | Standard Error | DF  | t Value | p-Value |
| Intercept                  |                           | 66.949   | 2.073          | 150 | 32.30   | <.0001  |
| time                       |                           | -0.017   | 0.080          | 141 | -0.21   | 0.8314  |
| group                      | COPD HRCT score $\leq 10$ | -0.049   | 3.450          | 936 | -0.01   | 0.9886  |
| group                      | COPD HRCT score >10       | 3.805    | 2.887          | 936 | 1.32    | 0.1879  |
| group                      | Asthma                    | 0        | .              | .   | .       | .       |
| time*group                 | COPD HRCT score $\leq 10$ | -0.0551  | 0.086          | 936 | -0.64   | 0.5212  |
| time*group                 | COPD HRCT score >10       | -0.1311  | 0.076          | 936 | -1.73   | 0.0832  |
| time*group                 | Asthma                    | 0        | .              | .   | .       | .       |
| time*time                  |                           | 0.00099  | 0.001304       | 936 | 0.76    | 0.4478  |

| <b>Type 3 Tests of Fixed Effects</b> |        |        |         |         |
|--------------------------------------|--------|--------|---------|---------|
| Effect                               | Num DF | Den DF | F Value | P-Value |
| time                                 | 1      | 141    | 1.30    | 0.2569  |
| group                                | 2      | 936    | 1.06    | 0.3464  |
| time*group                           | 2      | 936    | 1.51    | 0.2213  |
| time*time                            | 1      | 936    | 0.58    | 0.4478  |
